# Supplementary material
Source: PubMed Central journal article supplement (PMC4751857)

**Figure S1.-** Alignment of the predicted SfmALP1, SfmALP2 and SfsALP1 protein sequences obtained using the CLC Genomics Workbench v8.0 software. In dark are residues predicted to contain N-glycosylation sites according to the NetNGlyc 1.0 server (<http://www.cbs.dtu.dk/services/NetNGlyc/>). Residues are colored according to the conservation in all three sequences from blue (low conservation) to red (high conservation). Asterisk denotes residue predicted to function as GPI-anchor site in SfmALP1 and SfmALP2 by PredGPI, fragANCHOR, and GPI-SOM databases.

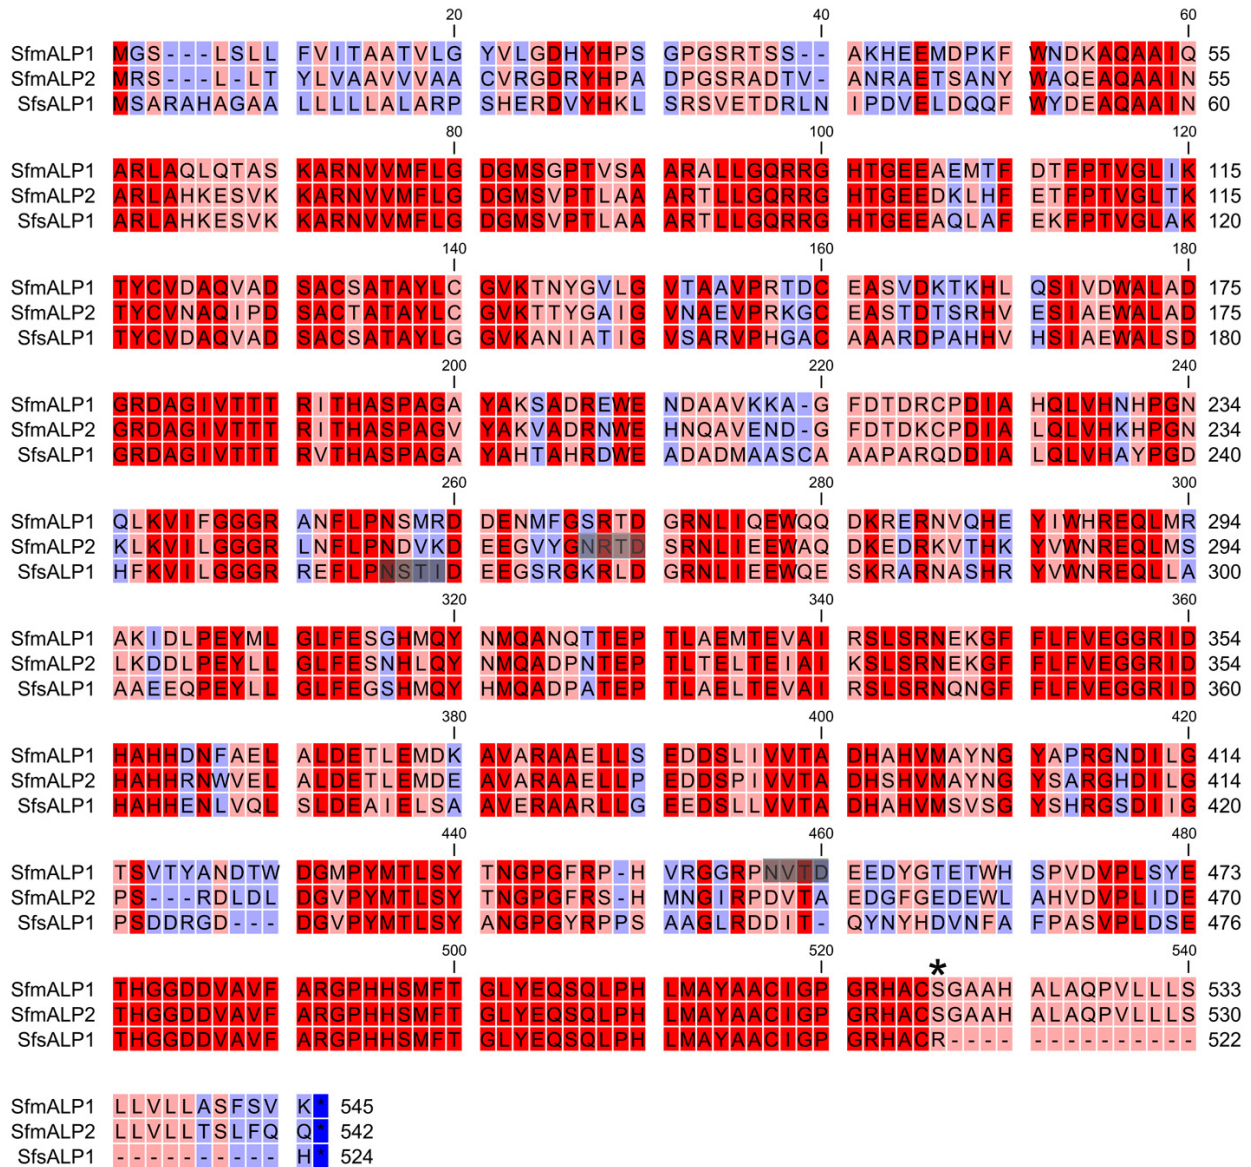

**Figure S2.-** Alignment of the predicted SfmALP2 protein sequences in the Ben and 456 strains of *S. frugiperda*, obtained using the CLC Genomics Workbench v8.0 software. In dark are residues predicted to contain N-glycosylation sites according to the NetNGlyc 1.0 server (<http://www.cbs.dtu.dk/services/NetNGlyc/>). Residues are colored according to the conservation in all three sequences from blue (not conserved) to red (conserved).

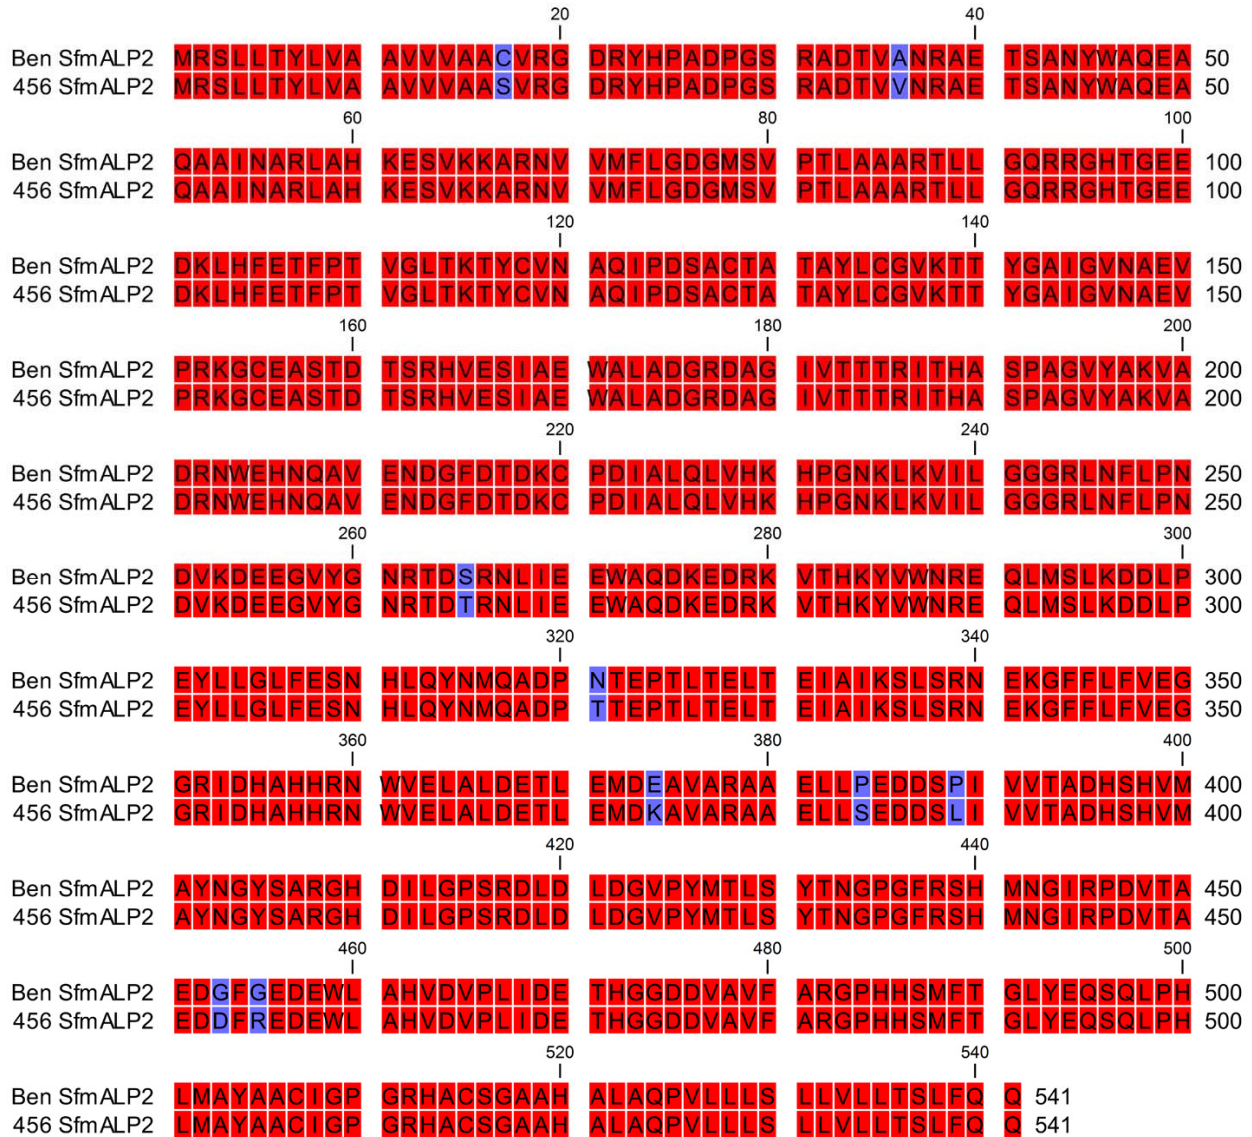

Supplement: AEM.02871-15_zam999116904so1.pdf [file AEM.02871-15_zam999116904so1.pdf]
